# Supplementary material for: In silico Analysis Reveals Distribution of Quorum Sensing Genes and Consistent Presence of LuxR Solos in the Pandoraea Species
Source: PubMed Central journal article supplement (PMC6691176; doi:10.3389/fmicb.2019.01758), 2019-08-06
Supplement: Data_Sheet_1.pdf [file Data_Sheet_1.pdf]

## *Supplementary Materials*

### ***In silico* analysis reveals novel class of quorum sensing genes and consistent presence of LuxR solos in the *Pandoraea* species**

**Kah-Ooi Chua<sup>1</sup>, Wah-Seng See-Too<sup>1</sup>, Robson Ee<sup>1</sup>, Yan-Lue Lim<sup>1</sup>, Wai-Fong Yin<sup>1</sup>, Kok-Gan Chan<sup>1,2\*</sup>**

<sup>1</sup> Division of Genetics and Molecular Biology, Institute of Biological Sciences, Faculty of Science, University of Malaya, 50603 Kuala Lumpur, Malaysia.

<sup>2</sup> International Genome Centre, Jiangsu University, Zhenjiang, China

\* **Correspondence:** Kok-Gan Chan: [kokgan@um.edu.my](mailto:kokgan@um.edu.my)

**Supplementary Table S1.** All bacteria strains with their description and culturing conditions used in this study.

| Strain                                                  | Description                                                                                                                                     | Culturing media, temperature | Source/reference              |
|---------------------------------------------------------|-------------------------------------------------------------------------------------------------------------------------------------------------|------------------------------|-------------------------------|
| <i>Chromobacterium violaceum</i> CV026                  | Biosensor derived from double mini-Tn5 mutant of ATCC31532 that synthesize purple violacein pigment for detection of short chain exogenous AHL. | LBA, 28°C                    | (McClellan et al., 1997)      |
| <i>Erwinia carotovora</i> GS101                         | Produces short chain exogenous AHL which served as positive control in CVO26 bioassay.                                                          | LBA, 28°C                    | Gift from Prof. Paul Williams |
| <i>Erwinia carotovora</i> PNP22                         | Negative control for CVO26 bioassay.                                                                                                            | LBA, 28°C                    | Gift from Prof. Paul Williams |
| <i>Pandoraea pnomenusa</i> RB-38                        | Soil isolate                                                                                                                                    | LBA, 28°C                    | This study                    |
| <i>Pandoraea pnomenusa</i> RB-44                        | Soil isolate                                                                                                                                    | LBA, 28°C                    | This study                    |
| <i>Pandoraea pnomenusa</i> 3kgm                         | Soil isolate                                                                                                                                    | LBA, 28°C                    | This study                    |
| <i>Pandoraea pnomenusa</i> DSM 16536 <sup>T</sup>       | Recovered from cystic fibrosis patient, United Kingdom.                                                                                         | TSA, 37°C                    | (Coenye et al., 2000)         |
| <i>Pandoraea pnomenusa</i> 6399                         | Recovered 11 months before the cystic fibrosis patient deceased, Australia.                                                                     | TSA, 37°C                    | (Ee et al., 2015a)            |
| <i>Pandoraea pnomenusa</i> 7641                         | Recovered from deceased cystic fibrosis patient, Australia.                                                                                     | TSA, 37°C                    | (Ee et al., 2015b)            |
| <i>Pandoraea pulmonicola</i> DSM 16583 <sup>T</sup>     | Recovered from sputum of cystic fibrosis patient, Canada.                                                                                       | TSA, 37°C                    | (Coenye et al., 2000)         |
| <i>Pandoraea sputorum</i> DSM 21091 <sup>T</sup>        | Recovered from sputum of cystic fibrosis patient USA.                                                                                           | TSA, 37°C                    | (Coenye et al., 2000)         |
| <i>Pandoraea apista</i> DSM 16535 <sup>T</sup>          | Recovered from sputum of cystic fibrosis patient, Denmark.                                                                                      | TSA, 37°C                    | (Coenye et al., 2000)         |
| <i>Pandoraea faecigallinarum</i> DSM 23572 <sup>T</sup> | Isolated from chicken dung, India.                                                                                                              | TSA, 28°C                    | (Sahin et al., 2011)          |
| <i>Pandoraea norimbergensis</i> DSM 11628 <sup>T</sup>  | Isolated from oxic water above sulfide containing lake sediment, Germany.                                                                       | TSA, 37°C                    | (Coenye et al., 2000)         |
| <i>Pandoraea thiooxydans</i> DSM 25325 <sup>T</sup>     | Isolated from rhizosphere soils of sesame <i>Sesamum indicum</i> L., Korea.                                                                     | TSA, 30°C                    | (Anandham et al., 2010)       |
| <i>Pandoraea vervacti</i> DSM 23571 <sup>T</sup>        | Isolated from uncultivated field soil, Turkey                                                                                                   | TSA, 28°C                    | (Sahin et al., 2011)          |
| <i>Pandoraea oxalativorans</i> DSM 23570 <sup>T</sup>   | Isolated from soil litter close to <i>Oxalis</i> sp., Turkey.                                                                                   | TSA, 28°C                    | (Sahin et al., 2011)          |

Abbreviation:

LBA, Luria-bertani agar;

TSA, Tryptic soy agar

**Supplementary Table 2.** Precursor and product ion  $m/z$  values of synthetic AHLs.

| Synthetic AHL | Precursor ion, Q1<br>( $m/z$ ) | Product ion, Q3<br>( $m/z$ ) |
|---------------|--------------------------------|------------------------------|
| C4-HSL        | 172                            | 102                          |
| C6-HSL        | 200                            | 102                          |
| C7-HSL        | 214                            | 102                          |
| C8-HSL        | 228                            | 102                          |
| C10-HSL       | 256                            | 102                          |
| C12-HSL       | 284                            | 102                          |
| 3-oxo-C6-HSL  | 214                            | 102                          |
| 3-oxo-C8-HSL  | 242                            | 102                          |
| 3-oxo-C10-HSL | 270                            | 102                          |
| 3-oxo-C12-HSL | 298                            | 102                          |

**Supplementary Table 3.** Designation code and accession number of all *Pandoraea* genomes retrieved from GenBank for this study.

| <b>Strain</b>              | <b>Designation code</b> | <b>Finishing status</b> | <b>GenBank ID</b> |
|----------------------------|-------------------------|-------------------------|-------------------|
| <i>P. pnomenusa</i> RB-38  | Ppn RB38                | Complete genome         | CP007506.3        |
| <i>P. pnomenusa</i> RB-44  | Ppn RB44                | Complete genome         | CP006938.1        |
| <i>P. pnomenusa</i> 3kgm   | Ppn 3kgm                | Complete genome         | CP006900.2        |
| <i>P. pnomenusa</i> 6399   | Ppn 6399                | Draft genome            | JTCR01            |
| <i>P. pnomenusa</i> 7641   | Ppn 7641                | Draft genome            | JTCS01            |
| <i>P. apista</i> AU2161    | Pap AU21                | Complete genome         | CP011501.1        |
| <i>P. apista</i> TF80G25   | Pap TF80                | Complete genome         | CP011279.1        |
| <i>P. apista</i> TF81F4    | Pap TF81                | Complete genome         | CP010518.3        |
| <i>Pandoraea</i> sp. B-6   | B-6                     | Draft genome            | AKXS01            |
| <i>Pandoraea</i> sp. E26   | E26                     | Draft genome            | AYXJ01            |
| <i>Pandoraea</i> sp. SD6-2 | SD6-2                   | Draft genome            | AQOU01            |

**Supplementary Table 4.** ANI analysis between genomes of *Pandoraea* species.

|     |       | Ppn   |       |       |       |       |       | Ppu   | Psp   | Pap   |        |       |       | Pno   | Pfa   | Pox   | Pth   | Pve   | <i>Pandoraea</i> sp. |       |       |
|-----|-------|-------|-------|-------|-------|-------|-------|-------|-------|-------|--------|-------|-------|-------|-------|-------|-------|-------|----------------------|-------|-------|
|     |       | DSM   | RB38  | RB44  | 3kgm  | 6399  | 7641  |       |       | DSM   | DSM    | DSM   | AU21  |       |       |       |       |       | TF80                 | TF81  | DSM   |
| Ppn | DSM   | 100   | 99.32 | 99.34 | 99.31 | 85.04 | 85.14 | 85.49 | 84.50 | 84.55 | 84.469 | 84.50 | 84.55 | 83.92 | 84.66 | 84.61 | 78.62 | 84.61 | 84.81                | 99.35 | 84.65 |
|     | RB38  | 99.32 | 100   | 99.41 | 99.44 | 84.66 | 84.59 | 85.06 | 84.50 | 84.43 | 84.48  | 84.46 | 84.40 | 83.97 | 84.52 | 84.71 | 78.57 | 84.67 | 84.77                | 99.41 | 84.67 |
|     | RB44  | 99.34 | 99.41 | 100   | 99.43 | 84.64 | 84.63 | 85.07 | 84.48 | 84.51 | 84.47  | 84.46 | 84.46 | 83.96 | 84.49 | 84.63 | 78.68 | 84.61 | 84.79                | 99.97 | 84.61 |
|     | 3kgm  | 99.31 | 99.44 | 99.43 | 100   | 84.61 | 84.58 | 85.07 | 84.43 | 84.47 | 84.48  | 84.45 | 84.49 | 83.94 | 84.54 | 84.64 | 78.54 | 84.67 | 84.85                | 99.44 | 84.67 |
|     | 6399  | 85.04 | 84.66 | 84.64 | 84.61 | 100   | 100   | 84.78 | 84.66 | 88.56 | 88.55  | 88.51 | 88.55 | 84.14 | 84.66 | 84.78 | 78.14 | 84.60 | 85.49                | 84.61 | 87.89 |
|     | 7641  | 85.14 | 84.59 | 84.63 | 84.58 | 100   | 100   | 84.77 | 84.64 | 88.46 | 88.55  | 88.53 | 88.48 | 84.12 | 84.58 | 84.79 | 78.21 | 84.60 | 85.45                | 84.65 | 87.86 |
| Ppu |       | 85.49 | 85.06 | 85.07 | 85.07 | 84.78 | 84.77 | 100   | 84.68 | 84.60 | 84.55  | 84.58 | 84.60 | 84.33 | 84.63 | 84.80 | 78.79 | 84.73 | 85.05                | 85.10 | 84.75 |
| Psp |       | 84.50 | 84.50 | 84.48 | 84.43 | 84.66 | 84.64 | 84.68 | 100   | 84.55 | 84.54  | 84.64 | 84.55 | 83.80 | 85.85 | 92.39 | 78.37 | 85.56 | 84.60                | 84.41 | 84.71 |
| Pap | DSM   | 84.55 | 84.43 | 84.51 | 84.47 | 88.56 | 88.46 | 84.60 | 84.55 | 100   | 99.31  | 99.31 | 99.31 | 84.15 | 84.58 | 84.68 | 78.19 | 84.44 | 85.32                | 84.44 | 87.77 |
|     | AU21  | 84.46 | 84.48 | 84.47 | 84.48 | 88.55 | 88.55 | 84.55 | 84.54 | 99.31 | 100    | 100   | 100   | 84.10 | 84.46 | 84.59 | 78.11 | 84.42 | 85.32                | 84.42 | 87.78 |
|     | TF80  | 84.50 | 84.46 | 84.46 | 84.45 | 88.51 | 88.53 | 84.58 | 84.64 | 99.31 | 100    | 100   | 100   | 84.10 | 84.48 | 84.72 | 78.11 | 84.48 | 84.30                | 84.48 | 87.77 |
|     | TF81  | 84.55 | 84.40 | 84.46 | 84.49 | 88.55 | 88.48 | 84.60 | 84.55 | 99.31 | 100    | 100   | 100   | 84.15 | 84.50 | 84.68 | 78.19 | 84.44 | 85.29                | 84.41 | 87.74 |
| Pno |       | 83.92 | 83.97 | 83.96 | 83.94 | 84.14 | 84.12 | 84.33 | 83.80 | 84.15 | 84.10  | 84.10 | 84.15 | 100   | 83.88 | 83.99 | 78.24 | 83.90 | 84.09                | 83.92 | 84.05 |
| Pfa |       | 84.66 | 84.52 | 84.49 | 84.54 | 84.66 | 84.58 | 84.63 | 85.80 | 84.58 | 84.46  | 84.48 | 84.50 | 83.80 | 100   | 85.10 | 78.47 | 86.70 | 84.54                | 84.47 | 84.62 |
| Pox |       | 84.61 | 84.71 | 84.63 | 84.64 | 84.78 | 84.79 | 84.80 | 92.39 | 84.68 | 84.59  | 84.72 | 84.68 | 83.99 | 85.72 | 100   | 78.35 | 85.90 | 84.71                | 84.60 | 84.79 |
| Pth |       | 78.62 | 78.57 | 78.68 | 78.54 | 78.14 | 78.21 | 78.79 | 78.37 | 78.19 | 78.11  | 78.11 | 78.19 | 78.24 | 78.47 | 78.35 | 100   | 78.25 | 78.08                | 78.42 | 77.85 |
| Pve |       | 84.61 | 84.67 | 84.61 | 84.67 | 84.60 | 84.60 | 84.73 | 85.56 | 84.44 | 84.42  | 84.48 | 84.44 | 83.90 | 86.70 | 85.90 | 78.25 | 100   | 84.53                | 84.49 | 84.59 |
| sp. | B-6   | 84.81 | 84.77 | 84.79 | 84.85 | 85.49 | 85.45 | 85.05 | 84.60 | 85.32 | 85.32  | 84.30 | 85.29 | 84.09 | 84.54 | 84.71 | 78.08 | 84.53 | 100                  | 85.05 | 85.81 |
|     | E26   | 99.35 | 99.41 | 99.97 | 99.44 | 84.61 | 84.65 | 85.10 | 84.41 | 84.44 | 84.42  | 84.48 | 84.41 | 83.92 | 84.47 | 84.60 | 78.42 | 84.49 | 85.05                | 100   | 84.67 |
|     | SD6-2 | 84.65 | 84.67 | 84.61 | 84.67 | 87.89 | 87.86 | 84.75 | 84.71 | 87.77 | 87.78  | 87.77 | 87.74 | 84.05 | 84.62 | 84.79 | 77.85 | 84.59 | 85.81                | 84.67 | 100   |

**Supplementary Table 5.** Gene designation, accession number, amino acid length, GC content and genetic orientation of all canonical LuxI/R1 and LuxR solos of *Pandora* species.

| Strain   | CVO26 bioassay (AHL detected) | Canonical LuxI<br>Accession number<br>(Length/GC content)<br>Genetic orientation | Canonical LuxR1<br>Accession number<br>(Length/GC content)<br>Genetic orientation | LuxR2 solo<br>Accession number<br>(Length/GC content)<br>Genetic orientation | LuxR3 solo<br>Accession number<br>(Length/GC content)<br>Genetic orientation |
|----------|-------------------------------|----------------------------------------------------------------------------------|-----------------------------------------------------------------------------------|------------------------------------------------------------------------------|------------------------------------------------------------------------------|
| Ppn DSM  | Positive (C8-HSL)             | PpnI<br>ALR35832.1<br>(245aa / 65.4%)<br>→                                       | PpnR1<br>ALR35833.1<br>(233aa / 62.0%)<br>←                                       | PpnR2<br>AIU26521.1<br>(255aa / 61.1%)<br>→                                  | PpnR3<br>CP009553.2 (4877704bp - 4878696bp)<br>(330aa / 67.4%)<br>→          |
| Ppn RB38 | Positive (C8-HSL)             | PpnI<br>AHN77101.1<br>(261aa / 65.5%)<br>→                                       | PpnR1<br>AHN77102.1<br>(233aa / 62.0%)<br>←                                       | PpnR2<br>AHN76935.1<br>(255aa / 61.0%)<br>→                                  | PpnR3<br>CP007506.2 (4853186bp - 4854178bp)<br>(330aa / 67.3%)<br>→          |
| Ppn RB44 | Positive (C8-HSL)             | PpnI<br>AHB74553.1<br>(261aa / 65.5%)<br>→                                       | PpnR1<br>AHB74552.1<br>(233aa / 61.3%)<br>←                                       | PpnR2<br>AHB74721.1<br>(255aa / 61.1%)<br>→                                  | PpnR3<br>CP006938.1 (2823449bp – 2824450bp)<br>(333 aa / 67.5%)<br>→         |
| Ppn 3kgm | ND                            | PpnI<br>WP_052167255.1<br>(191aa / 67.7%)<br>→                                   | PpnR1<br>WP_023594976.1<br>(233aa / 61.5%)<br>←                                   | PpnR2<br>AHB04908.1<br>(255aa / 61.1%)<br>→                                  | PpnR3<br>AHB08670.1<br>(330aa / 67.3%)<br>→                                  |
| Ppn 6399 | ND                            | -                                                                                | -                                                                                 | PpnR2<br>KHQ92691.1<br>(255aa / 59.1%)<br>→*                                 | PpnR3<br>WP_052240333.1<br>(275aa / 65.0%)<br>→*                             |
| Ppn 7641 | ND                            | -                                                                                | -                                                                                 | PpnR2<br>KHQ93427.1<br>(255aa / 59.1%)<br>→*                                 | PpnR3 (275 aa)<br>WP_052240333.1<br>(275aa / 65.0%)<br>→*                    |
| Ppu DSM  | -                             | -                                                                                | -                                                                                 | PpuR2<br>AJC19606.1<br>(255aa / 63.0%)<br>→                                  | PpuR3<br>WP_052266958.1<br>(271aa / 68.4%)<br>→                              |
| Psp DSM  | Positive (C8-HSL)             | PspI<br>WP_052252565.1                                                           | PspR1<br>AJC18748.1                                                               | PspR2<br>AJC18152.1                                                          | PspR3<br>AJC15852.1                                                          |

|          |                      |                                            |                                             |                                                  |                                                  |
|----------|----------------------|--------------------------------------------|---------------------------------------------|--------------------------------------------------|--------------------------------------------------|
|          |                      | (251aa / 64.4%)<br>→                       | (233aa / 57.3%)<br>←                        | (255aa / 60.4%)<br>→                             | (304aa / 64.6%)<br>→                             |
| Pap DSM  | -                    | -                                          | -                                           | PapR2<br>ALS67327.1<br>(255aa / 57.9%)<br>→      | PapR3<br>ALS65841.1<br>(275aa / 63.9%)<br>→      |
| Pap AU21 | ND                   | -                                          | -                                           | PapR2<br>AKI63579.1<br>(255aa / 57.9%)<br>→      | PapR3<br>WP_048628601.1<br>(275aa / 63.9%)<br>→  |
| Pap TF80 | ND                   | -                                          | -                                           | PapR2<br>AKH71307.1<br>(255aa / 57.9%)<br>→      | PapR3<br>WP_048628601.1<br>(275aa / 63.9%)<br>→  |
| Pap TF81 | ND                   | -                                          | -                                           | PapR2<br>AJE97338.1<br>(255aa / 57.9%)<br>→      | Not found                                        |
| Pno DSM  | Negative<br>(ND)     | PnoI<br>ALS60799.1<br>(249aa / 64.8%)<br>→ | PnoR1<br>ALS60800.1<br>(237aa / 58.7%)<br>← | PnoR2<br>ALS58731.1<br>(275aa / 61.2%)<br>→      | PnoR3<br>ALS60193.1<br>(246aa / 63.4%)<br>→      |
| Pfa DSM  | Negative<br>(ND)     | PfaI<br>AKM29569.1<br>(248aa / 64.5%)<br>→ | PfaR1<br>AKM32510.1<br>(233aa / 58.1%)<br>← | PfaR2<br>AKM29693.1<br>(255aa / 60.3%)<br>→      | PfaR3<br>WP_053059535.1<br>(310aa / 68.5%)<br>→  |
| Pox DSM  | Positive<br>(C8-HSL) | PoxI<br>AKC71607.1<br>(222aa / 60.7%)<br>→ | PoxR1<br>AKC72674.1<br>(233aa / 56.3%)<br>← | PoxR2<br>AKC71755.1<br>(255aa / 60.0%)<br>→      | PoxR3<br>AKC69307.1<br>(304aa / 65.2%)<br>→      |
| Pth DSM  | -                    | -                                          | -                                           | -                                                | -                                                |
| Pve DSM  | Positive<br>(C8-HSL) | PveI<br>AJP59868.1<br>(217aa / 62.8%)<br>→ | PveR1<br>AJP59867.1<br>(233aa / 59.4%)<br>← | PveR2<br>AJP58402.1<br>(255aa / 58.9%)<br>→      | PveR3<br>AJP56205.1<br>(286aa / 66.3%)<br>→      |
| B-6      | ND                   | -                                          | -                                           | LuxR2<br>WP_017233913.1<br>(255aa / 61.6%)<br>→* | LuxR3<br>WP_017232691.1<br>(275aa / 66.8%)<br>→* |

|       |    |                                                |                                                 |                                                  |                                              |
|-------|----|------------------------------------------------|-------------------------------------------------|--------------------------------------------------|----------------------------------------------|
| E26   | ND | LuxI<br>WP_051399213.1<br>(191aa / 68.1%)<br>→ | LuxR1<br>WP_051610646.1<br>(233aa / 61.4%)<br>← | LuxR2<br>WP_023594793.1<br>(255aa / 61.1%)<br>→* | Not found                                    |
| SD6-2 | ND | -                                              | -                                               | LuxR2<br>EON12348.1<br>(255aa / 56.6%)<br>→*     | LuxR3<br>EON14461.1<br>(275aa / 63.9%)<br>→* |

Note:  
 Asterisk (\*) indicates for unreliable orientation of *luxR2* solo and *luxR3* solo that were retrieved from different contigs of a draft genome.



**Supplementary Table 6.** Multiple alignment analysis of LuxI of *Pandoraea* species. Numbering is relative to curated LuxI sequence of *Vibrio fischeri* (Entry: P12747) retrieved from Swiss-Prot database. Residues labelled with asterisk are residues whose mutation contributed significance loss in activity in LuxI and RhlI (Fuqua and Greenberg, 2002). PpnI 3kgm and LuxI E26 were retrieved from local PROKKA analysis as the sequences annotated by NCBI are truncated.

| LuxI      | Key amino acid conserved in all LuxI-type protein |     |     |      |      |      |      |     |      |       |
|-----------|---------------------------------------------------|-----|-----|------|------|------|------|-----|------|-------|
|           | R25*                                              | F29 | W35 | E44* | D46* | D49* | R70* | F84 | E101 | R104* |
| PpnI DSM  | R                                                 | F   | W   | E    | D    | D    | R    | F   | E    | R     |
| PpnI RB38 | R                                                 | F   | W   | E    | D    | D    | R    | F   | E    | R     |
| PpnI RB44 | R                                                 | F   | W   | E    | D    | D    | R    | F   | E    | R     |
| PpnI 3kgm | R                                                 | F   | W   | E    | D    | D    | R    | F   | E    | R     |
| PnoI DSM  | R                                                 | F   | W   | E    | D    | D    | R    | F   | E    | R     |
| PfaI DSM  | R                                                 | F   | W   | E    | D    | D    | R    | F   | E    | R     |
| PspI DSM  | R                                                 | F   | W   | E    | D    | D    | R    | F   | E    | R     |
| PoxI DSM  | R                                                 | F   | W   | E    | D    | D    | R    | F   | E    | R     |
| PveI DSM  | R                                                 | F   | W   | E    | D    | D    | R    | F   | E    | R     |
| LuxI E26  | R                                                 | F   | W   | E    | D    | D    | R    | F   | E    | R     |

**Supplementary Table 7.** Multiple alignment analysis of LuxR of *Pandora* species. Numbering is relative to curated TraR sequence of *Agrobacterium tumefaciens* (Entry: P33905) retrieved from Swiss-Prot database (Subramoni et al., 2015).

| LuxR        |             | Key amino acid in autoinducer binding domain |     |     |     |     |      | Key amino acid in DNA binding domain |      |      |
|-------------|-------------|----------------------------------------------|-----|-----|-----|-----|------|--------------------------------------|------|------|
|             |             | W57                                          | Y61 | D70 | P71 | W85 | G113 | E178                                 | L182 | G188 |
| LuxR1       | PpnR1 DSM   | W                                            | Y   | D   | P   | W   | G    | E                                    | L    | G    |
|             | PpnR1 RB38  | W                                            | Y   | D   | P   | W   | G    | E                                    | L    | G    |
|             | PpnR1 RB44  | W                                            | Y   | D   | P   | W   | G    | E                                    | L    | G    |
|             | PpnR1 3kgm  | W                                            | Y   | D   | P   | W   | G    | E                                    | L    | G    |
|             | PspR1 DSM   | W                                            | Y   | D   | P   | W   | G    | E                                    | L    | G    |
|             | PnoR1 DSM   | W                                            | Y   | D   | P   | W   | G    | E                                    | L    | G    |
|             | PfaR1 DSM   | W                                            | Y   | D   | P   | W   | G    | E                                    | L    | G    |
|             | PoxR1 DSM   | W                                            | Y   | D   | P   | W   | G    | E                                    | L    | G    |
|             | PveR1 DSM   | W                                            | Y   | D   | P   | W   | G    | E                                    | L    | G    |
|             | LuxI E26    | W                                            | Y   | D   | P   | W   | G    | E                                    | L    | G    |
| LuxR2       | PpnR2 DSM   | W                                            | Y   | D   | P   | W   | G    | E                                    | L    | G    |
|             | PpnR2 RB38  | W                                            | Y   | D   | P   | W   | G    | E                                    | L    | G    |
|             | PpnR2 RB44  | W                                            | Y   | D   | P   | W   | G    | E                                    | L    | G    |
|             | PpnR2 3kgm  | W                                            | Y   | D   | P   | W   | G    | E                                    | L    | G    |
|             | PpnR2 6399  | W                                            | Y   | D   | P   | W   | G    | E                                    | L    | G    |
|             | PpnR2 7641  | W                                            | Y   | D   | P   | W   | G    | E                                    | L    | G    |
|             | PpuR2 DSM   | W                                            | Y   | D   | P   | W   | G    | E                                    | L    | G    |
|             | PspR2 DSM   | W                                            | Y   | D   | P   | W   | G    | E                                    | L    | G    |
|             | PapR2 DSM   | W                                            | Y   | D   | P   | W   | G    | E                                    | L    | G    |
|             | PapR2 AU21  | W                                            | Y   | D   | P   | W   | G    | E                                    | L    | G    |
|             | PapR2 TF80  | W                                            | Y   | D   | P   | W   | G    | E                                    | L    | G    |
|             | PapR2 TG81  | W                                            | Y   | D   | P   | W   | G    | E                                    | L    | G    |
|             | PnoR2 DSM   | W                                            | Y   | D   | P   | W   | G    | E                                    | L    | G    |
|             | PfaR2 DSM   | W                                            | Y   | D   | P   | W   | G    | E                                    | L    | G    |
|             | PoxR2 DSM   | W                                            | Y   | D   | P   | W   | G    | E                                    | L    | G    |
|             | PveR2 DSM   | W                                            | Y   | D   | P   | W   | G    | E                                    | L    | G    |
|             | LuxR2 B-6   | W                                            | Y   | D   | P   | W   | G    | E                                    | L    | G    |
|             | LuxR2 E26   | W                                            | Y   | D   | P   | W   | G    | E                                    | L    | G    |
| LuxR2 SD6-2 | W           | Y                                            | D   | P   | W   | G   | E    | L                                    | G    |      |
| LuxR3       | PpnR3 DSM   | W                                            | Y   | D   | P   | W   | G    | E                                    | L    | G    |
|             | PpnR3 RB38  | W                                            | Y   | D   | P   | W   | G    | E                                    | L    | G    |
|             | PpnR3 RB44  | W                                            | Y   | D   | P   | W   | G    | E                                    | L    | G    |
|             | PpnR3 3kgm  | W                                            | Y   | D   | P   | W   | G    | E                                    | L    | G    |
|             | PpnR3 6399  | W                                            | Y   | D   | P   | W   | G    | E                                    | L    | G    |
|             | PpnR3 7641  | W                                            | Y   | D   | P   | W   | G    | E                                    | L    | G    |
|             | PpuR3 DSM   | W                                            | Y   | D   | P   | W   | G    | E                                    | L    | G    |
|             | PspR3 DSM   | W                                            | Y   | D   | P   | W   | G    | E                                    | L    | G    |
|             | PapR3 DSM   | W                                            | Y   | D   | P   | W   | G    | E                                    | L    | G    |
|             | PapR3 AU21  | W                                            | Y   | D   | P   | W   | G    | E                                    | L    | G    |
|             | PapR3 TF80  | W                                            | Y   | D   | P   | W   | G    | E                                    | L    | G    |
|             | PnoR3 DSM   | W                                            | Y   | D   | P   | W   | G    | E                                    | L    | G    |
|             | PfaR3 DSM   | W                                            | Y   | D   | P   | W   | G    | E                                    | L    | G    |
|             | PoxR3 DSM   | W                                            | Y   | D   | P   | W   | G    | E                                    | L    | G    |
|             | PveR3 DSM   | W                                            | Y   | D   | P   | W   | G    | E                                    | L    | G    |
|             | LuxR3 B-6   | W                                            | Y   | D   | P   | W   | G    | E                                    | L    | G    |
|             | LuxR3 SD6-2 | W                                            | Y   | D   | P   | W   | G    | E                                    | L    | G    |

**Supplementary Figure 1.** MRM MS analysis for characterization of AHL profile. Synthetic C8-HSL ( $m/z$ : 228) was loaded as the reference (top chromatogram). C8-HSL was detected as the only signaling molecule produced by *P. pnomenus* DSM 16536<sup>T</sup> (2<sup>nd</sup> chromatogram from top), *P. sputorum* DSM 21091<sup>T</sup> (3<sup>rd</sup> chromatogram from top), *P. oxalativorans* DSM 23570<sup>T</sup> (4<sup>th</sup> chromatogram from top) and *P. vervacti* DSM 23571<sup>T</sup> (bottom chromatogram).

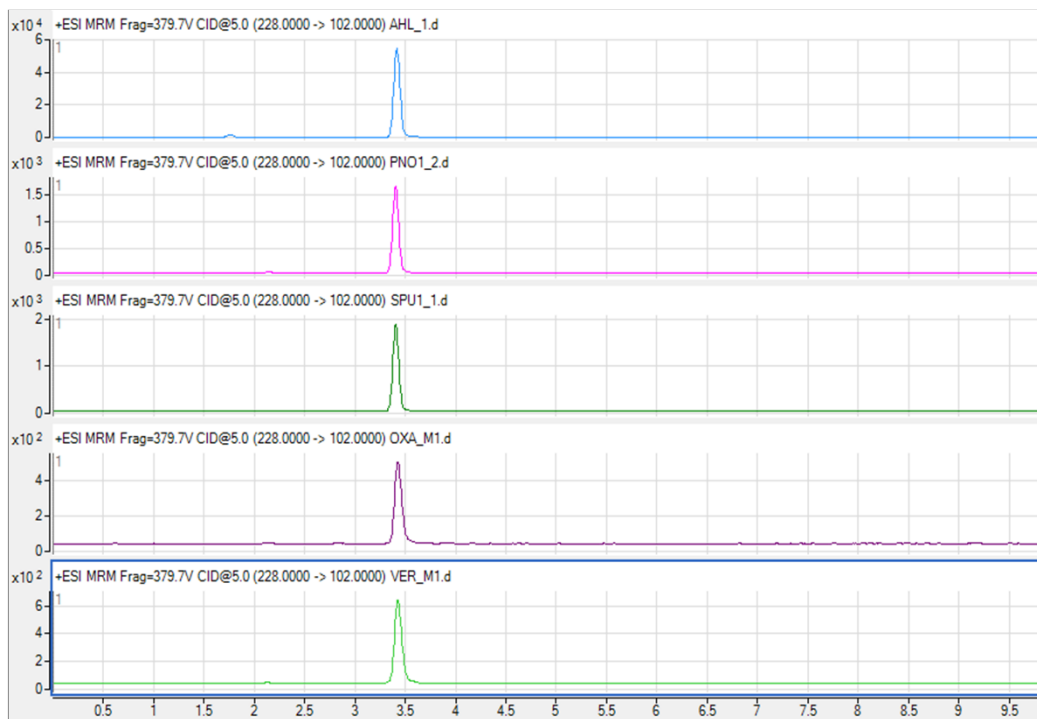

**Supplementary Figure 2.** Comparison of the 20bp *lux* box sequences located upstream of *cepI*, *soli*, *rhlI* and *luxI* of *Pandora* species. **(Figure 1a)** Sequences used for comparison are *cepI* K56-2, *Burkholderia cenocepacia* K56-2 (Lewenza et al., 1999); *soli* AW1, *Ralstonia solanacearum* AW1 (Flavier et al., 1997); *rhlI* PAO1, *Pseudomonas aeruginosa* PAO1 (Latifi et al., 1995). Black arrows indicate inverted repeats of the palindromic sequences and shaded boxes indicate identical nucleotide against the consensus sequence (Gray et al., 1994). Consensus sequence abbreviations are: N is A, T, C, or G; R is A or G; S is C or G; Y is T or C; and X is N or a gap in the sequence. **(Figure 1b)** Graphical representation of the *lux* box sequences.

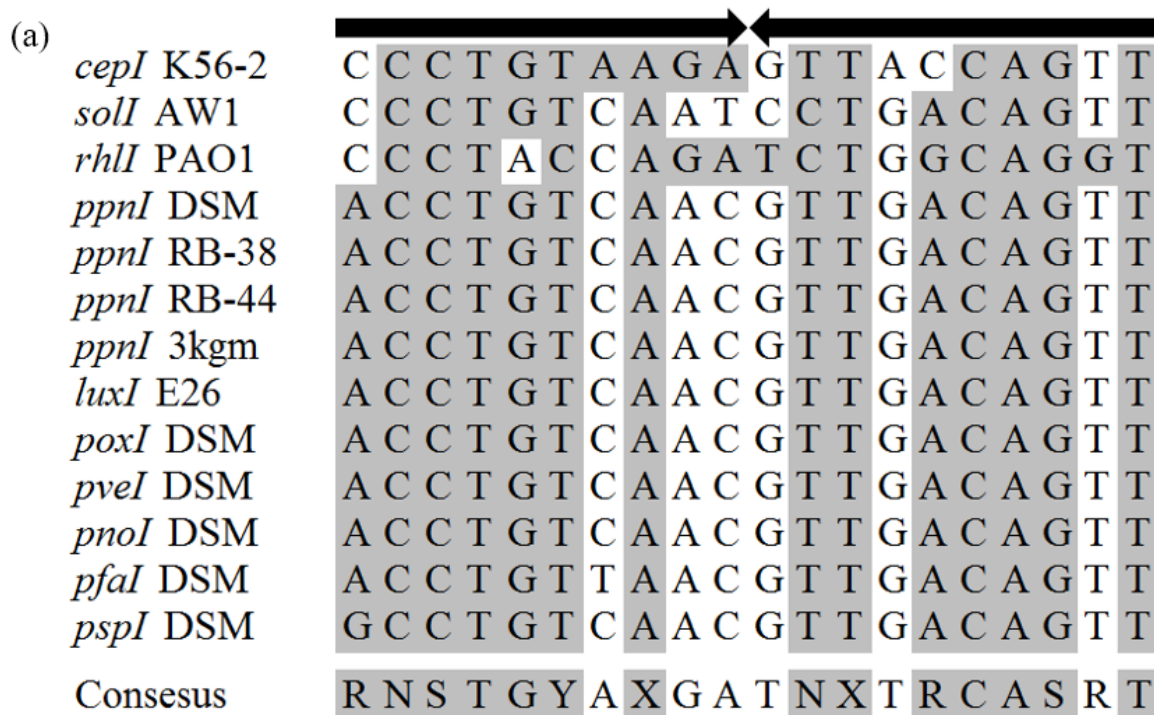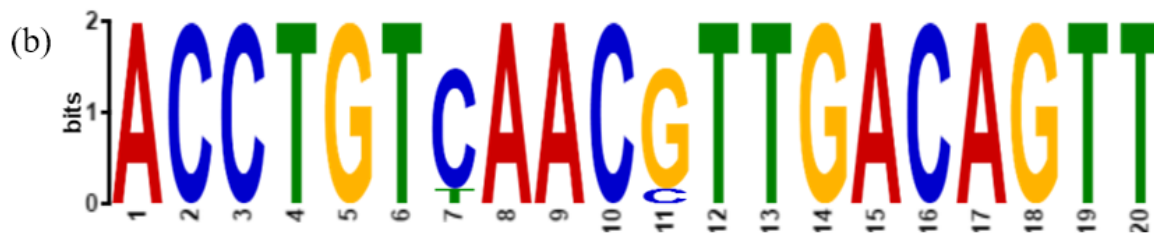

## References

- Anandham, R., Indiragandhi, P., Kwon, S.W., Sa, T.M., Jeon, C.O., Kim, Y.K., and Jee, H.J. (2010). *Pandoraea thiooxydans* sp. nov., a facultatively chemolithotrophic, thiosulfate-oxidizing bacterium isolated from rhizosphere soils of sesame (*Sesamum indicum* L.). *Int. J. Syst. Evol. Microbiol.* 60, 21-26.
- Coenye, T., Falsen, E., Hoste, B., Ohlen, M., Goris, J., Govan, J.R., Gillis, M., and Vandamme, P. (2000). Description of *Pandoraea* gen. nov. with *Pandoraea apista* sp. nov., *Pandoraea pulmonicola* sp. nov., *Pandoraea pnomenus* sp. nov., *Pandoraea sputorum* sp. nov. and *Pandoraea norimbergensis* comb. nov. *Int. J. Syst. Evol. Microbiol.* 50 Pt 2, 887-899.
- Ee, R., Ambrose, M., Lazenby, J., Williams, P., and Chan, K.G. (2015a). Genome Sequences of Two *Pandoraea pnomenus* Isolates Recovered 11 Months Apart from a Cystic Fibrosis Patient. *Genome Announc.* 3.
- Ee, R., Ambrose, M., Lazenby, J., Williams, P., Chan, K.G., and Roddam, L. (2015b). Genome Sequences of Two *Pandoraea pnomenus* Isolates Recovered 11 Months Apart from a Cystic Fibrosis Patient. *Genome Announc.* 3.
- Flavier, A.B., Ganova-Raeva, L.M., Schell, M.A., and Denny, T.P. (1997). Hierarchical autoinduction in *Ralstonia solanacearum*: control of acyl-homoserine lactone production by a novel autoregulatory system responsive to 3-hydroxypalmitic acid methyl ester. *J. Bacteriol.* 179, 7089-7097.
- Fuqua, C., and Greenberg, E.P. (2002). Listening in on bacteria: acyl-homoserine lactone signalling. *Nat. Rev. Mol. Cell. Biol.* 3, 685-695.
- Gray, K.M., Passador, L., Iglewski, B.H., and Greenberg, E.P. (1994). Interchangeability and specificity of components from the quorum-sensing regulatory systems of *Vibrio fischeri* and *Pseudomonas aeruginosa*. *J. Bacteriol.* 176, 3076-3080.
- Latifi, A., Winson, M.K., Foglino, M., Bycroft, B.W., Stewart, G.S., Lazdunski, A., and Williams, P. (1995). Multiple homologues of LuxR and LuxI control expression of virulence determinants and secondary metabolites through quorum sensing in *Pseudomonas aeruginosa* PAO1. *Mol. Microbiol.* 17, 333-343.
- Lewenza, S., Conway, B., Greenberg, E.P., and Sokol, P.A. (1999). Quorum sensing in *Burkholderia cepacia*: identification of the LuxRI homologs CepRI. *J. Bacteriol.* 181, 748-756.
- Mcclean, K.H., Winson, M.K., Fish, L., Taylor, A., Chhabra, S.R., Camara, M., Daykin, M., Lamb, J.H., Swift, S., Bycroft, B.W., Stewart, G.S., and Williams, P. (1997). Quorum sensing and *Chromobacterium violaceum*: exploitation of violacein production and inhibition for the detection of N-acylhomoserine lactones. *Microbiol.* 143 ( Pt 12), 3703-3711.
- Sahin, N., Tani, A., Kotan, R., Sedlacek, I., Kimbara, K., and Tamer, A.U. (2011). *Pandoraea oxalativorans* sp. nov., *Pandoraea faecigallinarum* sp. nov. and *Pandoraea vervacti* sp. nov., isolated from oxalate-enriched culture. *Int. J. Syst. Evol. Microbiol.* 61, 2247-2253.
- Subramoni, S., Florez Salcedo, D.V., and Suarez-Moreno, Z.R. (2015). A bioinformatic survey of distribution, conservation, and probable functions of LuxR solo regulators in bacteria. *Front. Cell. Infect. Microbiol.* 5, 16.
